# Return to Work after Percutaneous Coronary Intervention: The Predictive Value of Self-Reported Health Compared to Clinical Measures

Karin Biering<sup>1\*</sup>, Torsten Toftegaard Nielsen<sup>2†</sup>, Kurt Rasmussen<sup>1</sup>, Troels Niemann<sup>3</sup>, Niels Henrik Hjollund<sup>1,4</sup>

**1** Department of Occupational Medicine, Regional Hospital West Jutland, Herning, Denmark, **2** Department of Cardiology, Aarhus University Hospital, Skejby, Aarhus, Denmark, **3** Department of Cardiology, Herning Regional Hospital, Herning, Denmark, **4** Department of Clinical Epidemiology, Aarhus University Hospital, Aarhus, Denmark

## Abstract

**Aims:** Coronary heart disease is prevalent in the working-age population. Traditional outcome measures like mortality and readmission are of importance to evaluate the prognosis but are hardly sufficient. Ability to work is an additional outcome of clinical and societal significance. We describe trends and predictors of Return To Work (RTW) after PCI and describe a possible benefit using patient-reported measures in risk stratification of RTW.

**Methods:** A total of 1585 patients aged less than 67 years treated with PCI in 2006–2008 at the Aarhus University Hospital were enrolled. Clinical information was provided through the West Denmark Heart Registry, and 4 weeks after PCI we mailed a questionnaire regarding self-rated health (response rate 83.5%). RTW was defined at weekly basis using extensive register data on transfer payments. Predictors of RTW were analysed as time to event. ROC curves constructed by logistic regression of predicting variables were evaluated by the c-statistic.

**Results:** Four weeks before PCI 50% of the patients were working; the corresponding figures were 25% after 4 weeks, 36% after 12 weeks, and 43% after one year. The patients' self-rated health one month after the procedure was a significant better predictor of RTW compared to other variables including LVEF, both at short (12 weeks) and long (one year) term.

**Conclusions:** The patient's self-rated health four weeks after the procedure was a stronger predictor than left ventricular ejection fraction (LVEF), and consequently useful when patients seek medical advice with respect to RWT.

**Citation:** Biering K, Nielsen TT, Rasmussen K, Niemann T, Hjollund NH (2012) Return to Work after Percutaneous Coronary Intervention: The Predictive Value of Self-Reported Health Compared to Clinical Measures. PLoS ONE 7(11): e49268. doi:10.1371/journal.pone.0049268

**Editor:** Claudio Moretti, S.G.Battista Hospital, Italy

**Received:** August 5, 2012; **Accepted:** October 8, 2012; **Published:** November 16, 2012

**Copyright:** © 2012 Biering et al. This is an open-access article distributed under the terms of the Creative Commons Attribution License, which permits unrestricted use, distribution, and reproduction in any medium, provided the original author and source are credited.

**Funding:** This study was funded by The Danish Heart association (<http://www.hjerteforeningen.dk/forskning/>) grant #R71-A2364-B1059 and R79-A2855-B1059, The Danish Working Environment Research Fund (<http://arbejdstilsynet.dk/en/engelsk/research/arbejds miljoforskningsfonden>) grant #4-2009-03 and Western Denmark Research Forum for Health Research (no website and grant number). The funders had no role in study design, data collection and analysis, decision to publish, or preparation of the manuscript.

**Competing Interests:** The authors have declared that no competing interests exist.

\* E-mail: Karin.Biering@vest.rm.dk

† Deceased.

## Introduction

In Denmark, approximately 9000 patients are treated annually with percutaneous coronary intervention (PCI), of whom 2500 are below 65 years [1]. Traditional outcome measures like mortality and readmission are of importance to evaluate the prognosis, but are hardly sufficient. Ability to work is an additional outcome of clinical and societal significance. Literature about PCI and return to work (RTW) in general is sparse and often described in selected populations with potentially inadequate measures of RTW. In Denmark, it is possible to describe RTW week by week for all citizens due to full coverage of population-based registers. A recent register-based study on labour market participation among patients with coronary heart disease showed that they left the workforce faster compared to persons without coronary heart disease [2].

LVEF is a well-described predictor of RTW [3,4], while patient-reported health measures are less often used. Use of patient-reported measures in clinical practice has become increasingly more frequent during the last decade [5]. There is agreement that patient-reported measures add valuable information to the clinicians, but some measures are considered time-consuming and difficult to handle in the clinical setting [6–9]. Self-reported health and quality of life has previously been found to predict readmissions and mortality [8,10–12], and it may be useful for prediction of difficulties in RTW and a useful tool in risk stratification in rehabilitation if kept simple and easy to handle.

The primary aim of the study was to describe frequency and time trends of RTW for the PCI-treated patients in an unselected working age population, and to identify predictors of RTW. Secondly, we aimed to describe the value of using simple and

**Table 1.** Baseline characteristics of 1585 patients treated with PCI at Aarhus University Hospital 2006–2008.

|                                  |                                | Total    | Gender   |         | P-value* | Indication |          | P-value* |
|----------------------------------|--------------------------------|----------|----------|---------|----------|------------|----------|----------|
|                                  |                                |          | Men      | Women   |          | Acute      | Other    |          |
|                                  |                                | n = 1585 | n = 1256 | n = 329 |          | n = 502    | n = 1083 |          |
| Age (years)                      | –44                            | 8.5%     | 7.5%     | 12.2%   | 0.03     | 12.5%      | 6.6%     | <0.01    |
|                                  | 45–54                          | 27.5%    | 28.3%    | 24.3%   |          | 29.1%      | 26.8%    |          |
|                                  | 55–59                          | 23.4%    | 23.9%    | 21.6%   |          | 22.7%      | 23.7%    |          |
|                                  | 60–67                          | 40.6%    | 40.3%    | 41.9%   |          | 35.7%      | 42.9%    |          |
| Gender                           | Female                         | 20.8%    | –        | –       |          | 19.1%      | 21.5%    | 0.28     |
|                                  | Male                           | 79.2%    | –        | –       |          | 80.9%      | 78.5%    |          |
| Working Status (week before PCI) | Self-supporting                | 37.4%    | 41.3%    | 22.5%   | <0.01    | 52.4%      | 30.5%    | <0.01    |
|                                  | Labour-market-related benefits | 2.5%     | 2.1%     | 4.0%    |          | 4.4%       | 1.6%     |          |
|                                  | Health-related benefits        | 22.8%    | 22.3%    | 24.9%   |          | 10.4%      | 28.6%    |          |
|                                  | Early retirement               | 26.1%    | 23.7%    | 35.3%   |          | 23.5%      | 27.3%    |          |
|                                  | Normal retirement              | 11.0%    | 10.4%    | 13.4%   |          | 9.1%       | 11.9%    |          |
|                                  | Not living in DK               | 0.13%    | 0.16%    | 0%      |          | 0.2%       | 0.09%    |          |
| Indication                       | Acute MI                       | 31.7%    | 32.3%    | 29.2%   | 0.28     | –          | –        |          |
|                                  | Other                          | 68.3%    | 67.7%    | 70.8%   |          | –          | –        |          |
| LVEF (%)                         | –34                            | 5.1%     | 4.9%     | 5.8%    | 0.03     | 6.2%       | 4.6%     | <0.01    |
|                                  | 35–54                          | 35.6%    | 37.3%    | 29.2%   |          | 51.0%      | 28.4%    |          |
|                                  | 55+                            | 52.2%    | 51.0%    | 56.8%   |          | 33.3%      | 61.0%    |          |
|                                  | Missing                        | 7.0%     | 6.8%     | 8.2%    |          | 9.6%       | 5.9%     |          |
| BMI (kg/m <sup>2</sup> )         | –24.9                          | 28.2%    | 24.0%    | 44.1%   | <0.01    | 30.2%      | 27.1%    | <0.01    |
|                                  | 25–29.9                        | 44.0%    | 48.0%    | 28.9%   |          | 44.2%      | 44.0%    |          |
|                                  | 30+                            | 23.4%    | 23.2%    | 24.0%   |          | 17.7%      | 26.0%    |          |
|                                  | Missing                        | 4.4%     | 4.7%     | 3.0%    |          | 7.5%       | 2.9%     |          |
| Smoking status                   | Never                          | 17.6%    | 17.9%    | 16.4%   | 0.15     | 13.1%      | 19.7%    | <0.01    |
|                                  | Current                        | 42.8%    | 41.6%    | 47.1%   |          | 59.4%      | 35.1%    |          |
|                                  | Previous                       | 34.7%    | 35.7%    | 31.0%   |          | 23.3%      | 40.0%    |          |
|                                  | Missing                        | 4.9%     | 4.7%     | 5.5%    |          | 4.2%       | 5.3%     |          |
| Diabetes                         | No                             | 83.7%    | 83.9%    | 82.7%   | 0.69     | 87.1%      | 82.1%    | 0.04     |
|                                  | Insuline treated               | 4.9%     | 4.7%     | 5.7%    |          | 6.4%       | 9.0%     |          |
|                                  | Non-insuline                   | 8.1%     | 8.0%     | 8.5%    |          | 3.6%       | 5.5%     |          |
|                                  | Missing                        | 3.3%     | 3.3%     | 3.0%    |          | 3.0%       | 3.4%     |          |
| Respondent to questionnaire      | Yes                            | 83.5%    | 83.8%    | 82.4%   | 0.55     | 84.1%      | 83.2%    | 0.67     |
|                                  | No                             | 16.5%    | 16.2%    | 17.6%   |          | 15.9%      | 16.8%    |          |

Total and stratified by gender and indication.

\*P-values were derived from Chi<sup>2</sup> test.

doi:10.1371/journal.pone.0049268.t001

easily obtained patient-reported measures in individual risk stratification for RTW.

## Methods

Central Denmark Region is one of five administrative units in Denmark with 700,000 inhabitants between 25 and 67 years [13]. All patients in this region referred to acute as well as subacute PCI are treated at one single unit at the Aarhus University Hospital, Skejby. From February 2006 to March 2008, we enrolled all first-time PCI-treated patients below 67 years of age. In this period, 3966 persons were treated with PCI. Patients with no record of previous PCI (n = 1752) were identified in the hospital's patient administrative system. Information on address and vital status was collected from the Danish Civil Registration System (CPR). A total

of 167 patients were excluded because they died within the first 4 weeks (n = 26) or because CPR had recorded a denial to participate in research in general (n = 141). One month after the PCI, the remaining 1585 patients were mailed a questionnaire including questions on self-rated health (SF-12). The SF-12 instrument has previously been validated in different cohorts of heart patients [14–16].

Clinical data were collected from the Western Denmark Heart Registry (WDHR), which includes data on patients who have been subjected to coronal angiography, PCI, cardiac valve and bypass operations [17]. Variables include indication of the PCI, left ventricular ejection fraction (LVEF) and body mass index (BMI).

Information on weekly working status was collected from The Danish Register for Evaluation of Marginalization (DREAM),

**Table 2.** Patient reported outcomes 4 weeks after PCI of 1323 patients, who responded to questionnaire.

|                                 |           | Total      | Gender     |            | P-value* | Indication |            | P-value* |
|---------------------------------|-----------|------------|------------|------------|----------|------------|------------|----------|
|                                 |           |            | Men        | Women      |          | Acute      | Other      |          |
|                                 |           | n = 1323   | n = 1052   | n = 271    |          | n = 422    | n = 901    |          |
| SF12 General Health             | Poor      | 2.6%       | 2.7%       | 2.2%       | <0.01    | 2.4%       | 2.7%       | 0.11     |
|                                 | Fair      | 16.3%      | 13.7%      | 26.6%      |          | 12.6%      | 18.1%      |          |
|                                 | Good      | 40.4%      | 39.1%      | 45.8%      |          | 41.5%      | 40.0%      |          |
|                                 | Very good | 31.7%      | 35.1%      | 18.8%      |          | 34.8%      | 30.3%      |          |
|                                 | Excellent | 6.7%       | 7.4%       | 3.7%       |          | 6.6%       | 6.7%       |          |
|                                 | Missing   | 2.3%       | 2.1%       | 3.0%       |          | 2.1%       | 2.3%       |          |
| SF12 Mental component score**   | Mean(sd)  | 49.1(10.6) | 50.1(10.1) | 44.9(11.8) | <0.01    | 48.7(10.2) | 49.3(10.8) | 0.37     |
| SF12 Physical component score** | Mean(sd)  | 45.9(10.2) | 46.6(10.1) | 42.6(10.1) | <0.01    | 46.1(9.7)  | 45.7(10.4) | 0.55     |

Total and stratified by gender and indication.

\*P-values were derived from Chi<sup>2</sup> test or unpaired t-test.

\*\*The SF12 component scores range from 0 to 100, the higher score the better rating of health. 156 patients had missing component scores due to one or more missing items.

doi:10.1371/journal.pone.0049268.t002

which includes information on all public transfer payments administered by Danish ministries and municipalities for Danish citizens since 1991. In Denmark, employed citizens are entitled to sick-leave benefit after 2 weeks, and if an employer pays full salary during sick leave they receive municipal reimbursement. If there is no transfer income registered for a specific week, the person is

considered self-supporting or on short-term sick leave. Data from the DREAM database has been compared to other sources of information and found valid [18].

DREAM codes were grouped in 6 categories: self-supporting, labour-market-related benefits, health-related benefits, early retirement, normal retirement, and dead/emigrated. Self-support-

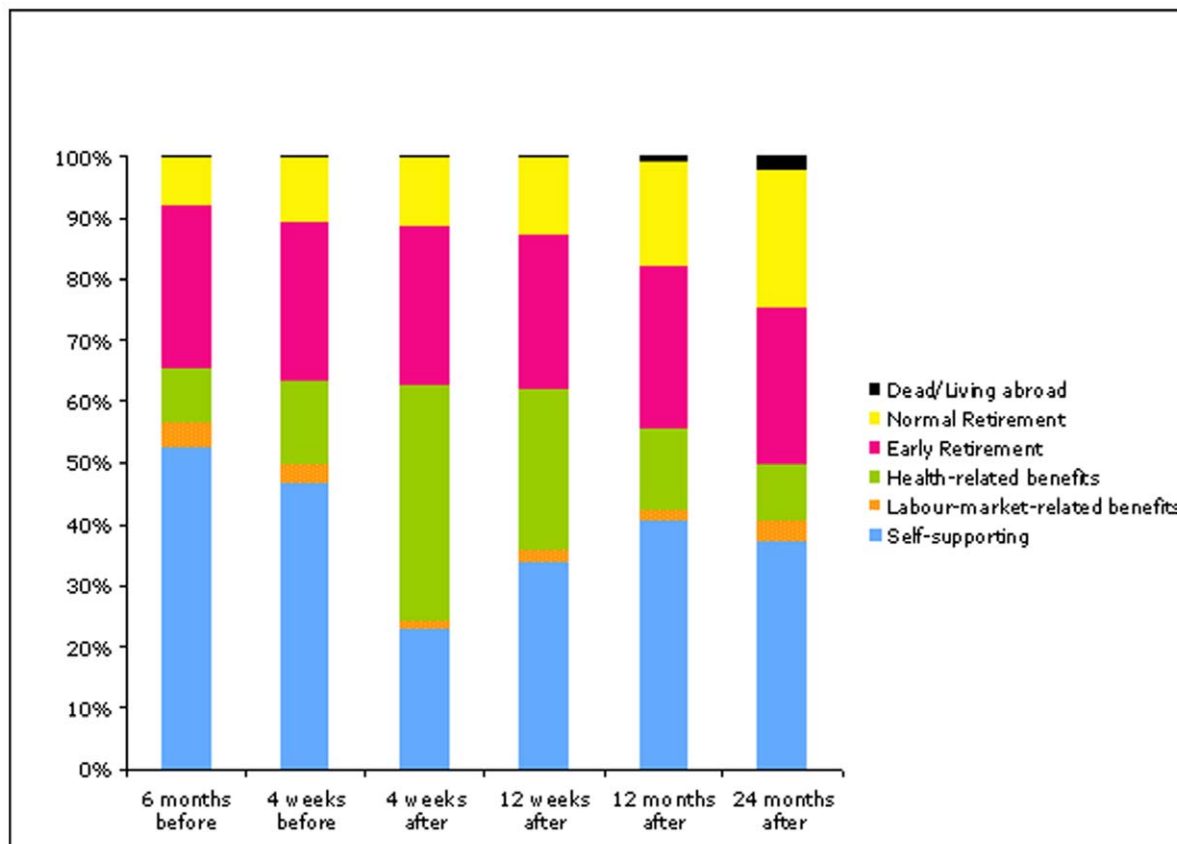

**Figure 1. Income sources for patients before and after PCI at Skejby University Hospital 1.** February 2006 to 1. March 2008.  
doi:10.1371/journal.pone.0049268.g001

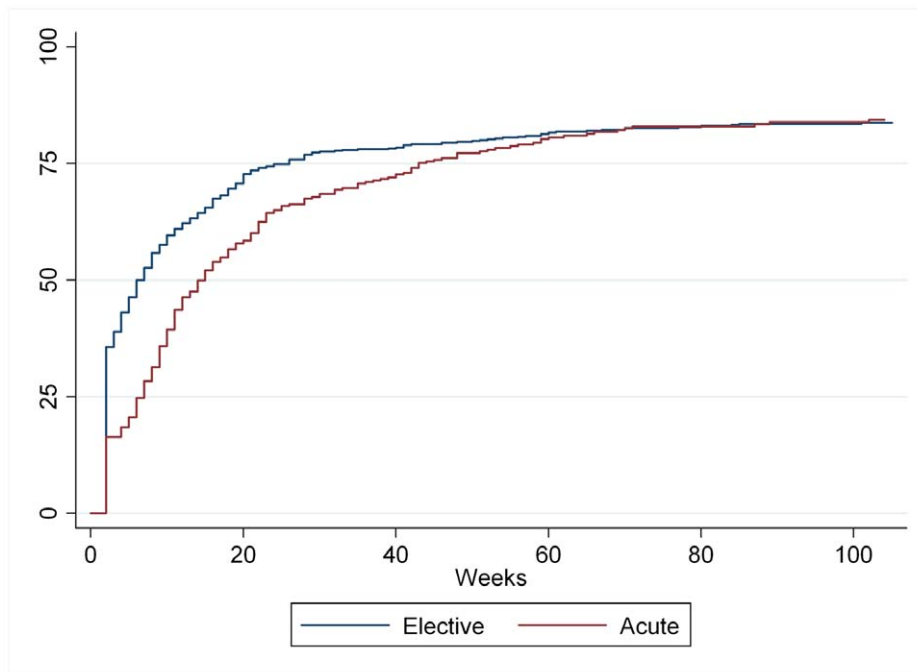

**Figure 2. Kaplan-Meier: Return to work by indication of PCI (N=994).**  
doi:10.1371/journal.pone.0049268.g002

ing includes persons who receive state education fund grants, maternity leave pay, and different leave-of-absence schemes. Health-related benefits includes persons receiving social assistance with other problems than unemployment, sickness benefit, vocational rehabilitation benefit, in flex job (jobs created for persons with limited work capacity), or unemployed from flex job. Early retirement contains persons over 60 years who have retired voluntarily or who are on anticipatory pension scheme or in light job (jobs created for persons on anticipatory pension). These definitions were previously used in a validation study [18].

Persons receiving social assistance range from those unemployed without labour-market insurance and no other problems than unemployment to people with severe social and psychological problems. Hence, those who were registered at job centres were allocated in the group with labour market-related benefit, while the others were allocated in the group with health-related benefits.

We calculated the proportions of each income category at multiple time points before and after the PCI. RTW was analysed by logistic regression and in time-to-event analyses. Analyses were performed in the whole population as well as in patients who were in the workforce before the PCI. DREAM categories were dichotomised so that the categories “Self-supporting” and “Labour market-related benefit” defined RTW. In Denmark citizen can only receive labour market-related benefit if they can document they are capable and willing to work. We defined RTW as at least four consecutive weeks of no health-related benefits. We defined the week of the PCI as “sick listed” for all patients regardless of their status in DREAM.

For both the time-to-event analysis of RTW and the logistic regression, patients who had permanently left the workforce in the week before the PCI were excluded ( $n = 591$ ).

### Statistical Methods

Time-to-event data were summarised with a Kaplan Meier plot. The proportional hazard assumption for Cox regression was not

met as the hazard ratio changed over time for the variables gender and indication for PCI. Instead, the pseudo-value regression approach was used to examine the cumulative risk ratio at two time points (12 weeks and one year after PCI) [19]. In the pseudo-value approach a new set of observations (the pseudo-values) are generated and used in a generalized linear model. The pseudo-values can take competing events under account. C-statistics (area under ROC curve) for selected predictors were estimated after logistic regression at the two time points [20]. Model fit of the logistic regressions was assessed by Hosmer-Lemeshow goodness-of-fit tests. Estimates were reported with 95% confidence intervals. Data were analysed in STATA, IC version 11 (Stata Corporation, College Station, Texas).

## Results

### Baseline Characteristics

Almost 80% of the patients were men and 32% were treated acute (Table 1). The baseline characteristics were much the same for men and women, except that women were less often overweight or obese and that more women had left the workforce. Patients treated acute were younger, with a higher LVEF, more often smokers and were more often in the workforce (Table 1). The questionnaire was returned by 1323 patients (83.5%). Non-respondents were slightly younger, with lower LVEF and more often not working before the PCI (data not shown).

### Self-reported Health

Four weeks after PCI women rated their health worse than male patients, both in the general health score and in the two component scores (Table 2). Self-rated health was similar in the two indication groups. Compared to the general Danish population in the age of 55–64 years (men and women, respectively), women in the study population rated their mental health one standard deviation lower, while they rated their physical health only a third standard deviation lower [21]. Men rated their mental

**Table 3.** Risk Ratio (RR) of Return to Work 12 weeks and one year after PCI according to demographics, clinical information and self-reported health.

|            |           | 12 weeks after PCI |                 | One year after PCI |                 |
|------------|-----------|--------------------|-----------------|--------------------|-----------------|
|            |           | Crude RR           | Adjusted RR*    | Crude RR           | Adjusted RR*    |
| Age        | –44       | 0.69[0.54;0.87]    | 0.86[0.68;1.08] | 0.94[0.83;1.06]    | 1.03[0.92;1.15] |
|            | 45–54     | 0.94[0.82;1.08]    | 1.01[0.89;1.15] | 0.97[0.89;1.05]    | 1.03[0.95;1.10] |
|            | 55–59     | 0.94[0.81;1.09]    | 1.00[0.87;1.14] | 1.00[0.92;1.09]    | 1.05[0.98;1.14] |
|            | 60–67     | Ref.               | Ref.            | Ref.               | Ref.            |
| Sex        | Female    | 0.66[0.54;0.80]    | 0.72[0.58;0.90] | 0.77[0.68;0.87]    | 0.85[0.75;0.96] |
|            | Male      | Ref.               | Ref.            | Ref.               | Ref.            |
| Indication | Acute MI  | 0.75[0.65;0.85]    | 0.78[0.68;0.89] | 0.97[0.91;1.04]    | 1.00[0.94;1.07] |
|            | Other     | Ref.               | Ref.            | Ref.               | Ref.            |
| LVEF       | –34       | 0.50[0.32;0.78]    | 0.66[0.40;1.09] | 0.64[0.48;0.84]    | 0.71[0.53;0.95] |
|            | 35–54     | 0.80[0.71;0.90]    | 0.89[0.80;0.99] | 0.90[0.84;0.88]    | 0.90[0.85;0.96] |
|            | 55+       | Ref.               | Ref.            | Ref.               | Ref.            |
| SF12 GH    | Poor      | 0.12[0.03;0.50]    | 0.14[0.04;0.58] | 0.34[0.18;0.62]    | 0.38[0.21;0.70] |
|            | Fair      | 0.45[0.34;0.60]    | 0.50[0.37;0.66] | 0.50[0.43;0.63]    | 0.55[0.44;0.67] |
|            | Good      | 0.66[0.56;0.77]    | 0.71[0.60;1.62] | 0.82[0.77;0.88]    | 0.84[0.79;0.90] |
|            | Very good | 0.92[0.80;1.06]    | 0.93[0.80;1.08] | 0.96[0.91;1.01]    | 0.95[0.90;1.00] |
|            | Excellent | Ref.               | Ref.            | Ref.               | Ref.            |
| SF12 MCS   | –49       | 0.63[0.56;0.72]    | 0.68[0.60;0.78] | 0.79[0.74;0.86]    | 0.82[0.76;0.88] |
|            | 50+       | Ref.               | Ref.            | Ref.               | Ref.            |
| SF12 PCS   | –49       | 0.58[0.52;0.66]    | 0.62[0.55;0.70] | 0.73[0.68;0.78]    | 0.76[0.71;0.82] |
|            | 50+       | Ref.               | Ref.            | Ref.               | Ref.            |

Low RR indicates difficulties.

\*Age, sex, indication and LVEF were mutually adjusted and adjusted for SF12GH while SF12 GH, SF12 MCS and SF12 PCS were adjusted for age, sex, indication and LVEF. doi:10.1371/journal.pone.0049268.t003

health half a standard deviation lower, and their physical health nearly as high as the general male population [21].

### Income Status before PCI and during Follow-up

In Figure 1, income sources before and after PCI is summarized. Roughly half of the patients were self-supporting prior to PCI. Four weeks after the PCI, 23% were self-supporting, and this figure increased to 34% after 3 months and to 40% at 1 year. Already 6 months before the PCI, 9% received health-related benefits, and this increased to 14% 4 weeks before the PCI. Four weeks after the PCI, 39% received health-related benefits, which after 12 weeks had decreased to 26% and at 1 year only 13% received health-related benefits. The proportion of early retirement was roughly constant at all measurement times, normal retirement increased due to increasing age.

Restricting the population to those working the week before the PCI (n = 593), 68% were back to work 12 weeks after PCI and 77% after one year (data not shown). Among those receiving health-related benefits at the week before the PCI (n = 362), 36%

and 47% returned to work after 12 weeks and one year, respectively (data not shown).

A total of 994 patients were working or only temporarily out of work in the week before the PCI.

Time to return to work for this group stratified on indication is described in the Kaplan-Meier plot in Figure 2.

### Risk Factors of Return to Work

The patients' report of their general health 4 weeks after the procedure was strongly associated with RTW at both 12 weeks and after one year with a very strong dose-response effect (Table 3). Mental health was nearly as important as the physical health. Low LVEF was also a risk factor at both short and long term. LVEF did not modify the effect of general health, as the estimates were stable within the strata of LVEF (data not shown).

In unadjusted analyses, young age was associated with low RTW shortly after the intervention, but this was not significant in adjusted analyses and the effect diminished after one year (Table 3). Female gender was associated with low RTW especially

**Table 4.** Predictors of RTW measured with c-statistics (area under ROC curve) with 95% CI at 12 weeks and one year after PCI.

|          | Age:            | Sex:            | Indication      | LVEF            | SF12GH:         | SF12 MCS        | SF12 PCS        | All predictors  |
|----------|-----------------|-----------------|-----------------|-----------------|-----------------|-----------------|-----------------|-----------------|
| 12 weeks | 0.54[0.51;0.58] | 0.56[0.53;0.59] | 0.57[0.54;0.60] | 0.61[0.56;0.64] | 0.68[0.64;0.71] | 0.66[0.62;0.70] | 0.72[0.68;0.76] | 0.77[0.74;0.81] |
| One year | 0.58[0.54;0.61] | 0.56[0.53;0.59] | 0.52[0.49;0.55] | 0.59[0.55;0.63] | 0.69[0.65;0.73] | 0.63[0.58;0.67] | 0.71[0.67;0.75] | 0.76[0.72;0.80] |

doi:10.1371/journal.pone.0049268.t004

shortly after the procedure, but also at long term. Patients treated on acute indication had more difficulties in RTW shortly after the procedure compared to elective treated patients, but this difference diminished after one year. Gender and indication did not modify the effect of the other variables on RTW.

In additional analyses, we considered dead and early retirement (voluntarily or health-related) as competing risk factors to the event of interest (RTW) while keeping normal retirement and emigration as censoring variables. This did not change the estimates.

### Predictors of Return to Work

The results of c-statistics (area under ROC curve) after logistic regression are shown in Table 4. SF12 scores, including the single-item SF12 GH, were the best predictors of both 12-week and one-year RTW (0.63–0.72) followed by LVEF (0.59–0.61). As in the time to event analysis of risk factors above, mental health predicts RTW nearly as well as the physical health. Age, gender, and indication (acute/elective) had little importance. Using all predictors in the model revealed c-statistics of 0.77 and 0.76, respectively.

### Discussion

In a population based study of 1585 patient treated with PCI we found that the patients' self-rated health one month after the procedure was a significant better predictor of RTW compared to other variables including LVEF, both at short (12 weeks) and long (one year) term. Mental health was nearly as important as physical health. The results were robust to stratifications and restrictions.

This study was based on a large cohort of PCI patients with complete register based follow-up of working status. The clinical data from WDHR are complete with respect to individuals [14], and only few values are missing. Self-reported health integrates all the patient's perceptions and beliefs and because the questionnaire was completed 4 weeks after the PCI, the patients already have some knowledge about the effect of the procedure and the doctor's advice of sick leave. This could be a part of the causal pathway. The wording in SF-12 is retrospective "In the preceding 4 weeks...", but for 345 patients the outcome of interest (RTW) occurred before answering the questionnaire. We made an additional analysis excluding these patients, but this changed the c-statistics only marginally.

Missing answers of single items of the SF12 scale resulted in 156 missing values of the mental component score (MCS) and the physical component score (PCS). Analyses based on multiple imputations using available SF-12 items, age, gender and working status did not change estimates or size of confidence intervals in analyses using the two component scores, and consequently the original data were used. A few missing values were present in the variables BMI, LVEF, smoking status and information about diabetes (Table 1). Since these variables originates from a clinical database where clinicians could forget to fill in some items, we consider these variables as missing completely at random (MCAR), since whether or not a variable was missing was not related to the outcome of interest and thus not likely to cause any bias. We had complete follow-up of weekly working status due to full coverage of registers of transfer income in the DREAM database, although there may be misclassifications as sick leave less than 2 weeks does not qualify for national benefit. The grouping of transfer-payment groups may cause misclassification, if a person on labour market-related benefit is not ready to work due to health problems, but fails to report this. However, the group was small and as citizens on labour market-related benefit are strongly encouraged to confirm their readiness to work every week, we consider this a

minor problem. Misclassification of the outcome may occur in persons who are not working, but provided income by their spouse or live as rentiers. In Denmark this is rather uncommon as only 2% of the population between 40 and 67 years are without personal income, so we consider it a minor problem.

Measuring RTW as a time-to-event measure has the disadvantage that it ignores relapses if a new sick listing occurs later. A major strength of using the DREAM register in relation to RTW is the ability to establish a measure that captures the RTW dynamically, and not only time to first RTW. In this study 245 persons experienced one or more new sick listings. We made additional analysis by excluding these 245 patients with a dubious outcome, and this enhanced the associations found.

Non-responders had lower LVEF and were less likely to have worked just before the PCI. We repeated the analysis after placing non-responders in the lower groups of the component scores, and this did not change the estimates found for self-reported health.

The proportion of patients working before the PCI was similar to previous findings [22,23]. RTW among patients working before the PCI compares well with previous studies [4,22–30]. Age [4,27,31] and gender [27] have previously been found to predict RTW in mixed populations of heart patients. Another study found neither gender nor age related to RTW [25]. However, Nielsen et al. found that gender modified the effect of low LVEF on RTW [3]. Studies of mortality in heart disease have found that gender differences diminish after adjustment for age [32], but we did not reproduce this with the outcome RTW. Gender differences in sickness absence are well known in Western countries [33], and are suggested to come from both direct and indirect gender effects, such as differences in daily life and social position [34].

Both myocardial infarction prior to the PCI [30] and LVEF [3] has previously been identified as predictors. We found that both acute myocardial infarction and LVEF were predictors; however, the self-reported measures of health were even stronger predictors of RTW.

Self-reported health has previously been found to predict readmissions and mortality after cardiovascular disease [8,10,11]. A large Dutch study of 1-year mortality after angiographic procedures found that problems with self-care and low self-rated health were the most powerful predictors among 22 clinical variables and reported that addition of self-reported health improved the model c-statistics from 0.78 to 0.81 [12]. In our study, an addition of the single-item general health from SF12 to the clinical information improves the model c-statistics from 0.66 to 0.73 for RTW at 12 weeks and from 0.66 to 0.75 at 1 year. Adding the complete SF12 score improved the c-statistics even more.

In both the analysis of risk factors and predictors we found that the mental health component score were nearly as important as the physical component scores. A recent review indicated that not only poor physical health, but also poor mental health was associated with adverse prognosis (mortality and rehospitalisation) in heart disease [35]. Anxiety and depression has previously been found associated with RTW after heart disease [27,36] and recent work has suggested a close relationship between negative emotions/distressed personality and the risk of incident heart disease as well as poor prognosis [37–40].

This study covers nearly all incident PCI patients, under the age of 67 years, originating from a well-defined population in Denmark. The findings are supposed to have high external validity in relation to countries with similar rules and regulations regarding health-related benefits.

Patients' subjective experiences may differ from clinicians' views and objective measures such as LVEF. Patient-reported measures

and objective measures should complement each other, and thus create a better basis for clinical advice to the patient and risk stratification in RTW.

## Acknowledgments

Unfortunately, our colleague Professor Torsten Toftegaard Nielsen has died before publication of this paper, his contributions has been highly appreciated among the remaining authors.

## References

- Nielsen NK (2008) Heart statistics 2008. The Danish Heart Foundation. 53p.
- Kruse MF, Sorensen JF, Davidsen MF, Gyrd-Hansen D (2009) Short and long-term labour market consequences of coronary heart disease: A register-based follow-up study. *European Journal of Preventive Cardiology* 16: 387–391.
- Nielsen FE, Sorensen HT, Skagen K (2004) A prospective study found impaired left ventricular function predicted job retirement after acute myocardial infarction. *Journal of Clinical Epidemiology* 57: 837–842.
- Laird-Meeter K, Erdman RA, van Domburg R, Azar AJ, de Feyter PJ, et al. (1989) Probability of a return to work after either coronary balloon dilatation or coronary bypass surgery. *European Heart Journal* 10: 917–922.
- Valderas JM, Kotzeva A, Espallargues M, Guyatt G, Ferrans CE, et al. (2008) The impact of measuring patient-reported outcomes in clinical practice: A systematic review of the literature. *Quality of Life Research*: 17: 179–193.
- Greenhalgh J (2009) The applications of PROs in clinical practice: What are they, do they work, and why? *Quality of Life Research*: 18: 115–123.
- Lohr KN, Zebrack BJ (2009) Using patient-reported outcomes in clinical practice: Challenges and opportunities. *Quality of Life Research*: 18: 99–107.
- Rumsfeld JS (2002) Health status and clinical practice: When will they meet? *Circulation* 106: 5–7.
- Snyder CF, Aaronson NK (2009) Use of patient-reported outcomes in clinical practice. *Lancet* 374: 369–370.
- Mejert M, Kahan T, Persson H, Edner M (2006) Predicting readmissions and cardiovascular events in heart failure patients. *International Journal of Cardiology* 109: 108–113.
- Rumsfeld JS, MaWhinney S, McCarthy M Jr, Shroyer AL, VillaNueva CB, et al. (1999) Health-related quality of life as a predictor of mortality following coronary artery bypass graft surgery. participants of the department of veterans affairs cooperative study group on processes, structures, and outcomes of care in cardiac surgery. *JAMA: The Journal of the American Medical Association* 281: 1298–1303.
- Lenzen MJ, Scholte op Reimer WJ, Pedersen SS, Boersma E, Maier W, et al. (2007) The additional value of patient-reported health status in predicting 1-year mortality after invasive coronary procedures: A report from the euro heart survey on coronary revascularisation. *Heart (British Cardiac Society)* 93: 339–344.
- Statistics Denmark. Population. Available: <http://www.dst.dk/HomeUK.aspx>. Accessed 2012 Jun 10.
- Lim LL, Fisher JD (1999) Use of the 12-item short-form (SF-12) health survey in an australian heart and stroke population. *Quality of Life Research*: 8: 1–8.
- Muller-Nordhorn J, Roll S, Willich SN (2004) Comparison of the short form (SF)-12 health status instrument with the SF-36 in patients with coronary heart disease. *Heart (British Cardiac Society)* 90: 523–527.
- Mols F, Pelle AJ, Kupper N (2009) Normative data of the SF-12 health survey with validation using postmyocardial infarction patients in the Dutch population. *Quality of Life Research*. 18: 403–414.
- Schmidt M, Maeng M, Jakobsen CJ, Madsen M, Thuesen L, et al. (2010) Existing data sources for clinical epidemiology: The Western Denmark Heart Registry. *Clinical Epidemiology* 2: 137–144.
- Hjollund NH, Larsen FB, Andersen JH (2007) Register-based follow-up of social benefits and other transfer payments: Accuracy and degree of completeness in a Danish interdepartmental administrative database compared with a population-based survey. *Scandinavian Journal of Public Health* 35: 497–502.
- Klein JP, Andersen PK (2005) Regression modeling of competing risks data based on pseudovalues of the cumulative incidence function. *Biometrics* 61: 223–229.
- Cook NR (2008) Statistical evaluation of prognostic versus diagnostic models: Beyond the ROC curve. *Clinical Chemistry* 54: 17–23.
- Bjorner JB, Trab Damsgaard M, Watt T, Bech P, Rasmussen NK, et al. (1997) Danish manual for SF-36: A questionnaire about health-status. 143p.
- McGee HM, Graham T, Crowe B, Horgan JH (1993) Return to work following coronary artery bypass surgery or percutaneous transluminal coronary angioplasty. *European Heart Journal* 14: 623–628.
- McKenna KT, McEnery PT, Maas F, Aroney CN, Bett JH, et al. (1994) Percutaneous transluminal coronary angioplasty: Clinical and quality of life outcomes one year later. *Australian and New Zealand Journal of Medicine* 24: 15–21.
- Mark DB, Lam LC, Lee KL, Jones RH, Pryor DB, et al. (1994) Effects of coronary angioplasty, coronary bypass surgery, and medical therapy on employment in patients with coronary artery disease. A prospective comparison study. *Annals of Internal Medicine* 120: 111–117.
- Bhattacharyya MR, Perkins-Porras L, Whitehead DL, Steptoe A (2007) Psychological and clinical predictors of return to work after acute coronary syndrome. *European Heart Journal* 28: 160–165.
- Holmes DR, Jr, Van Raden MJ, Reeder GS, Vlietstra RE, Jang GC, et al. (1984) Return to work after coronary angioplasty: A report from the national heart, lung, and blood institute percutaneous transluminal coronary angioplasty registry. *The American Journal of Cardiology* 53: 48C–51C.
- Soderman E, Lisspers J, Sundin O (2003) Depression as a predictor of return to work in patients with coronary artery disease. *Social Science & Medicine* (1982) 56: 193–202.
- Hofman-Bang C, Lisspers J, Nordlander R, Nygren A, Sundin O, et al. (1999) Two-year results of a controlled study of residential rehabilitation for patients treated with percutaneous transluminal coronary angioplasty. A randomized study of a multifactorial programme. *European Heart Journal* 20: 1465–1474.
- Abbas AE, Brodie B, Stone G, Cox D, Berman A, et al. (2004) Frequency of returning to work one and six months following percutaneous coronary intervention for acute myocardial infarction. *The American Journal of Cardiology* 94: 1403–1405.
- Fitzgerald ST, Becker DM, Celentano DD, Swank R, Brinker J (1989) Return to work after percutaneous transluminal coronary angioplasty. *The American Journal of Cardiology* 64: 1108–1112.
- Samkange-Zeeb F, Altenhoner T, Berg G, Schott T (2006) Predicting non-return to work in patients attending cardiac rehabilitation. *International Journal of Rehabilitation Research* 29: 43–49.
- Department of Clinical Epidemiology, Aarhus University Hospital (2008) Myocardial infarction - occurrence and prognosis. A study of first time admissions in Region North Jutland and Region Middle Jutland. 36p.
- Lund T, Labriola M, Christensen KB, Bultmann U, Villadsen E (2006) Return to work among sickness-absent danish employees: Prospective results from the Danish Work Environment Cohort Study/National register on social transfer payments. *International Journal of Rehabilitation Research* 29: 229–235.
- Bekker MH, Rutte CG, van Rijswijk K (2009) Sickness absence: A gender-focused review. *Psychology, Health & Medicine* 14: 405–418.
- Mommersteeg PM, Denollet J, Spertus JA, Pedersen SS (2009) Health status as a risk factor in cardiovascular disease: A systematic review of current evidence. *American Heart Journal* 157: 208–218.
- Fukuoka Y, Dracup K, Takeshima M, Ishii N, Makaya M, et al. (2009) Effect of job strain and depressive symptoms upon returning to work after acute coronary syndrome. *Social Science & Medicine* (1982) 68: 1875–1881.
- Denollet J, Pedersen SS, Daemen J, de Jaegere P, Serruys PW, et al. (2008) Reduced positive affect (anhedonia) predicts major clinical events following implantation of coronary-artery stents. *Journal of Internal Medicine* 263: 203–211.
- Denollet J, Schiffer AA, Spek V (2010) A general propensity to psychological distress affects cardiovascular outcomes: Evidence from research on the type D (distressed) personality profile. *Circulation. Cardiovascular Quality and Outcomes* 3: 546–557.
- Davidson KW, Mostofsky E, Whang W (2010) Don't worry, be happy: Positive affect and reduced 10-year incident coronary heart disease: The Canadian Nova Scotia health survey. *European Heart Journal* 31: 1065–1070.
- Pedersen SS, Kupper N, van Domburg RT (2011) Heart and mind: Are we closer to disentangling the relationship between emotions and poor prognosis in heart disease? *European Heart Journal*.

## Author Contributions

Conceived and designed the experiments: KB TTN KR TN NHH. Analyzed the data: KB. Wrote the paper: KB TTN KR TN NHH.
